# Supplementary figures and images for: Engineering high thermoelectric performance in homobilayer WS 2 through in-plane rotational symmetry breaking
Source: Royal Society of Chemistry journal article supplement (doi:10.1039/d5cp04158a), 2025-12-16

38.21°

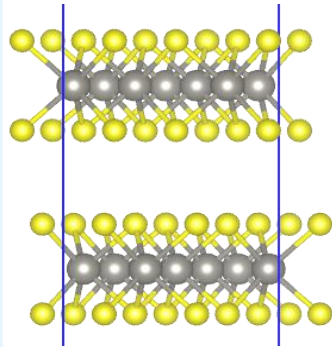

27.8°

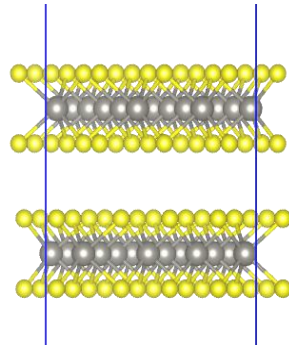

21.79°

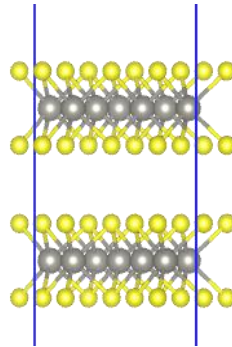

16.1°

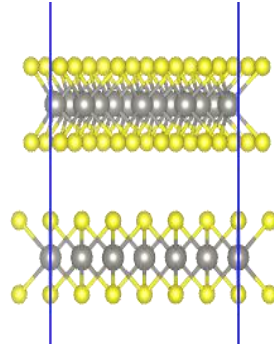

0°

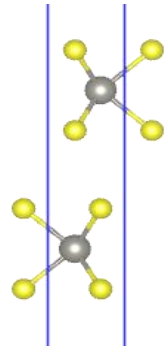

Supplement: d5cp04158a2.zip [file crystals_sideview.pdf › crystals_sideview.pdf]

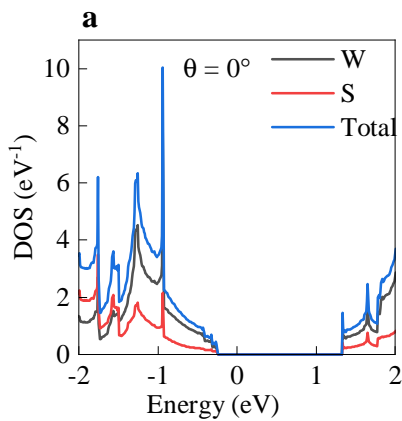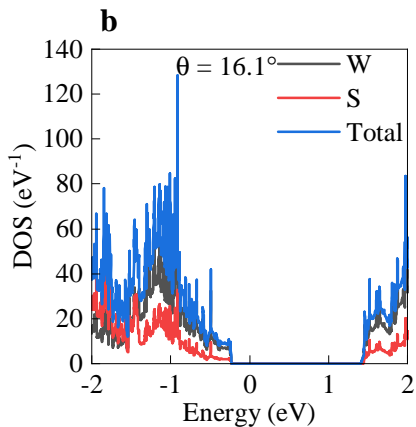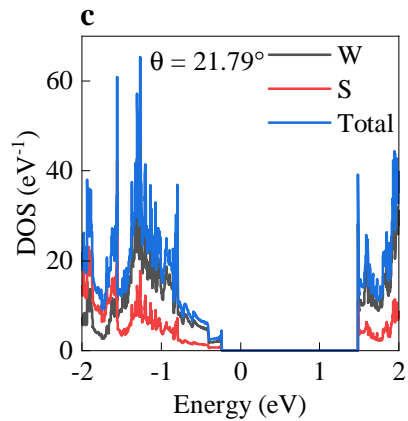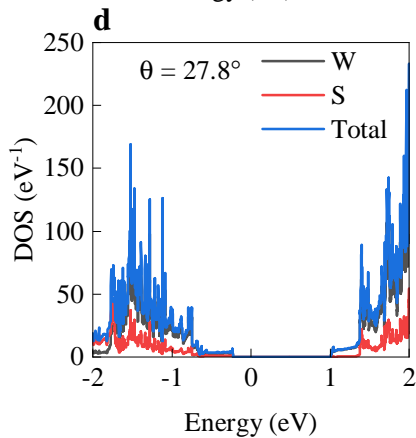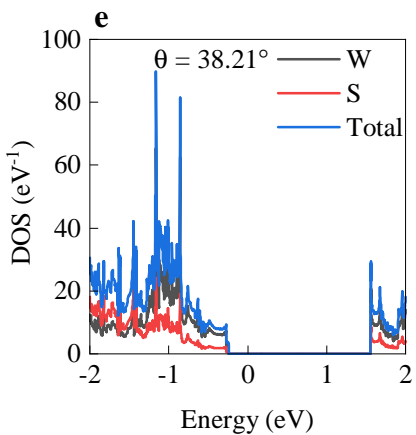

Supplement: d5cp04158a2.zip [file dos_all.pdf › dos_all.pdf]

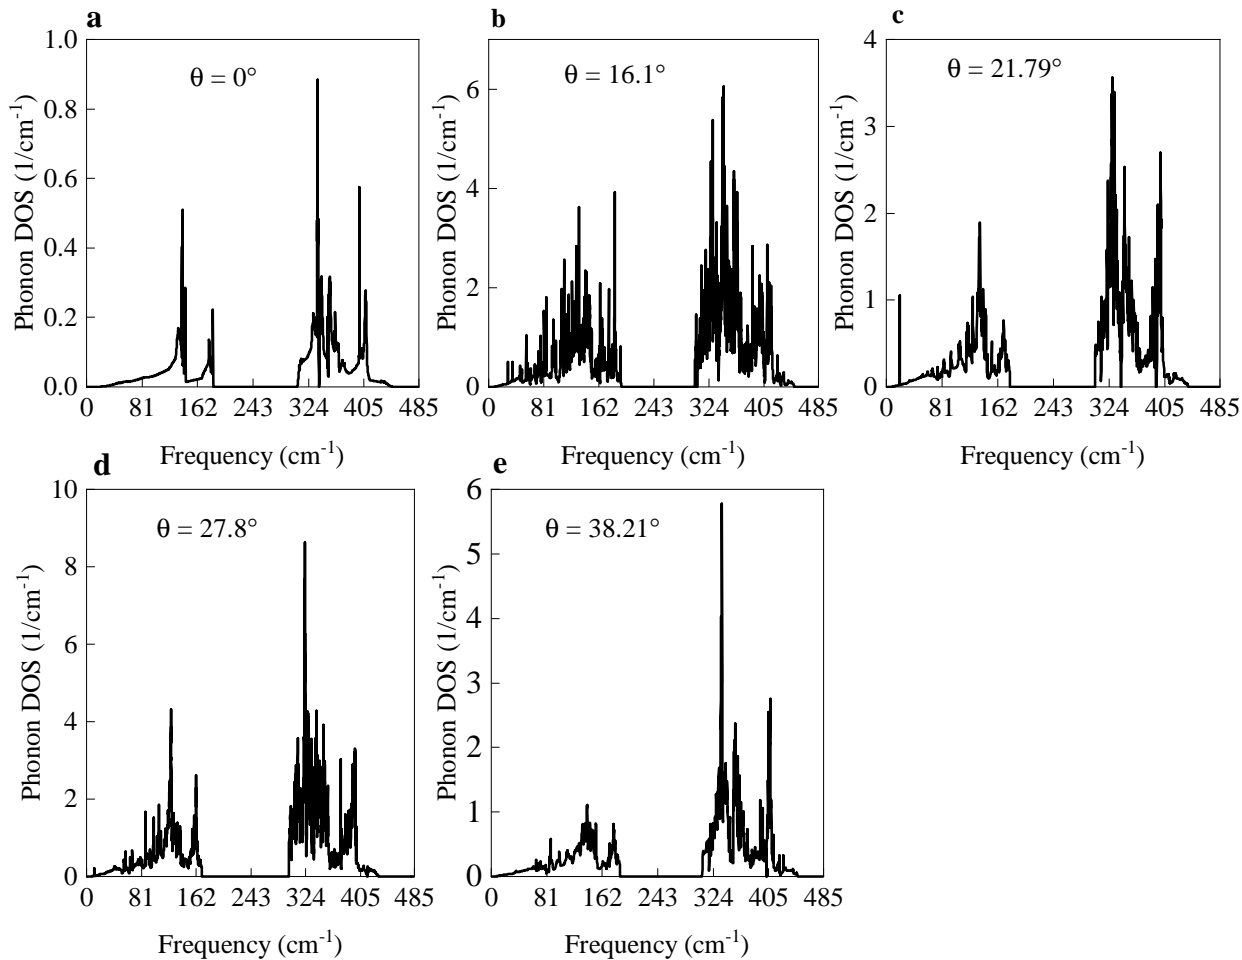

Supplement: d5cp04158a2.zip [file pdos_all.pdf › pdos_all.pdf]

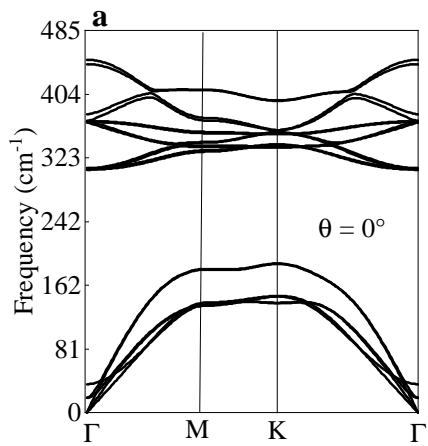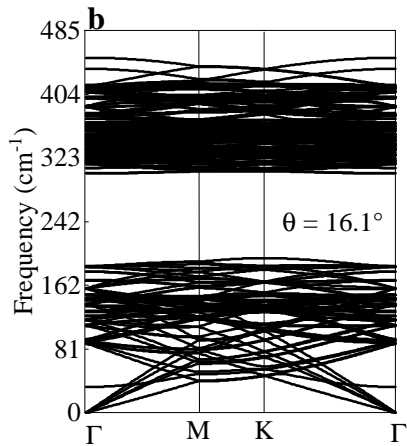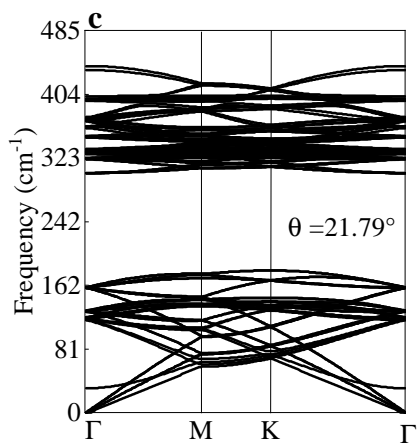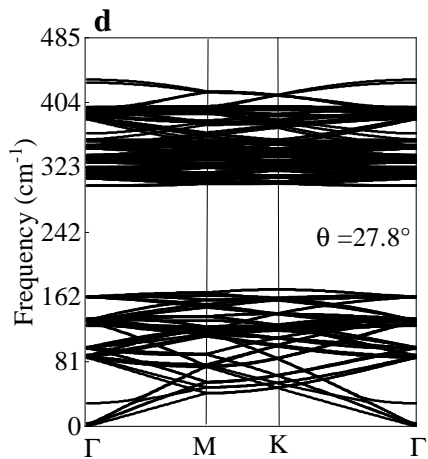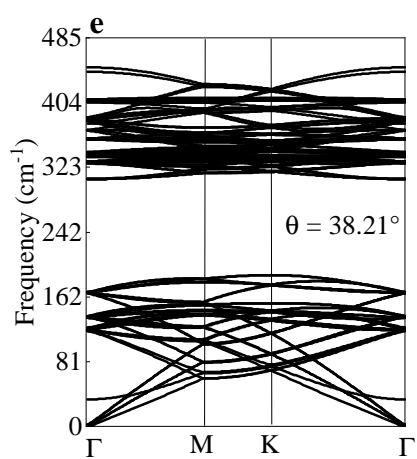

Supplement: d5cp04158a2.zip [file spectra_all.pdf › spectra_all.pdf]

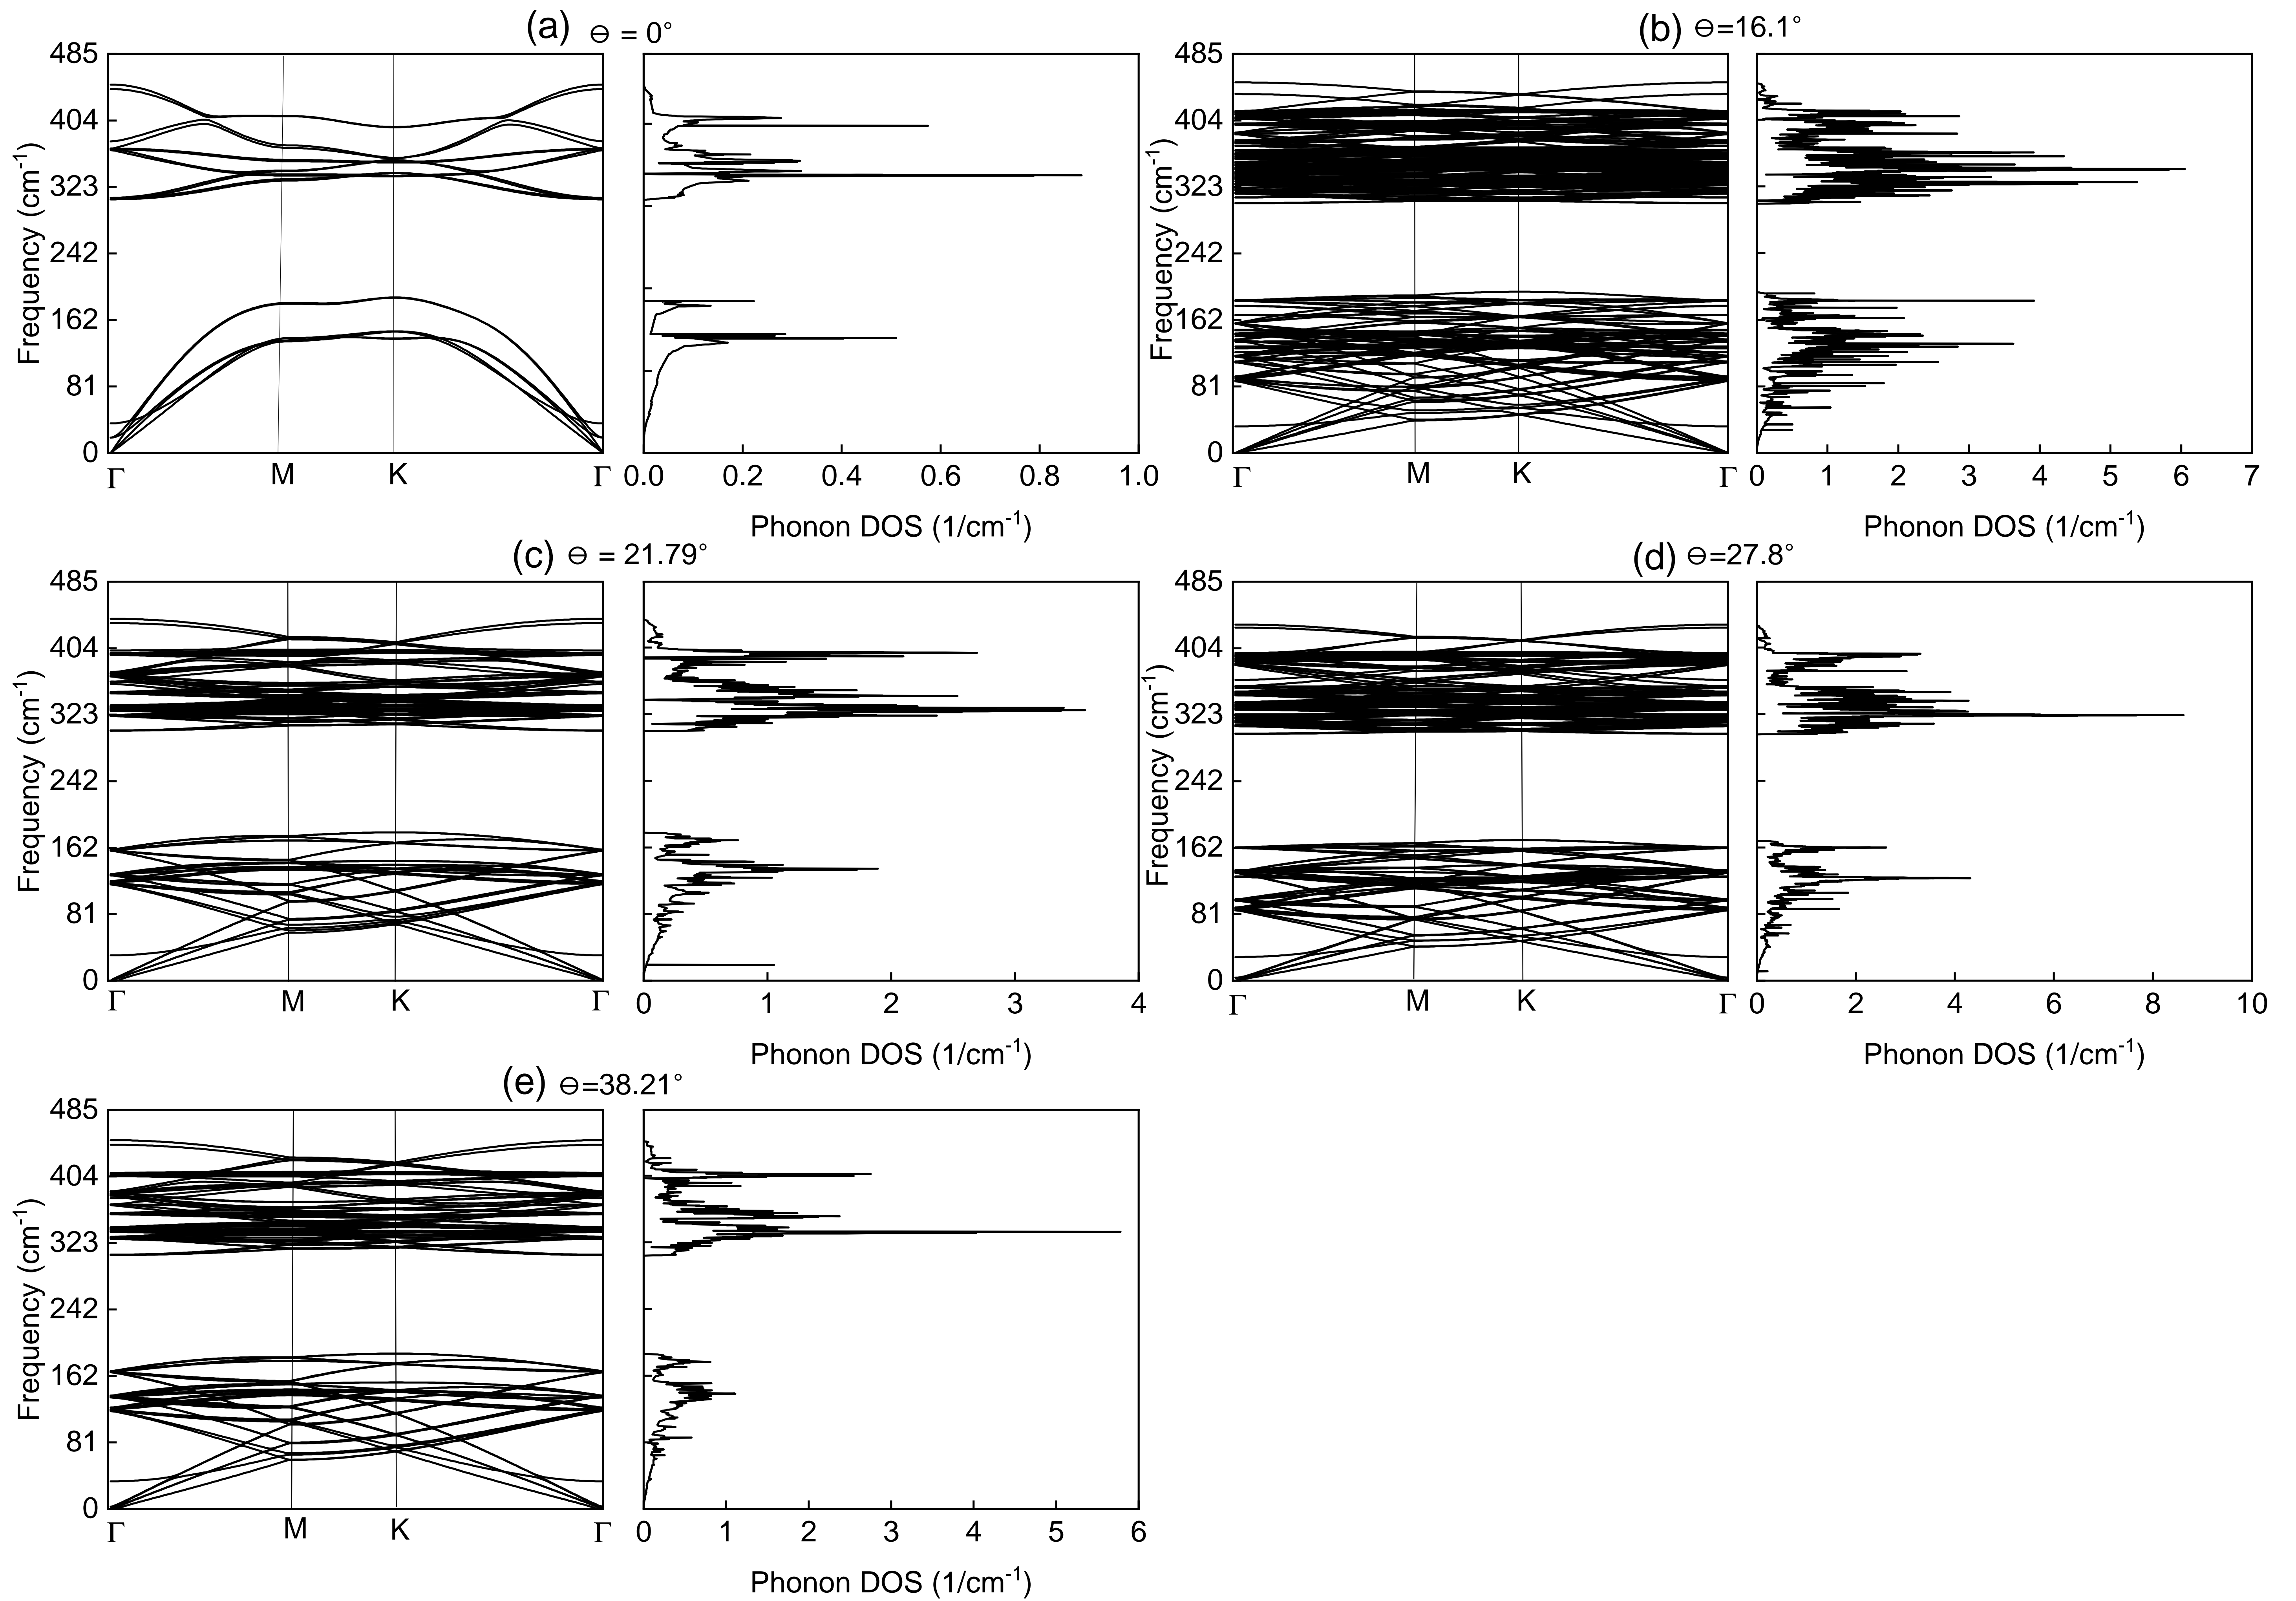

Supplement: d5cp04158a2.zip [file spectra_dos_all.pdf › spectra_dos_all.pdf]
